# Supplementary material for: Spatiotemporal Temperature Distribution of NIR Irradiated Polypyrrole Nanoparticles and Effects of pH
Source: MDPI journal article supplement (doi:10.3390/polym14153151), 2022-08-02
Supplement: s1 [file s1]

## Supplementary:

# Spatiotemporal Temperature Distribution of NIR Irradiated Polypyrrole Nanoparticles and Effects of pH

Omar Peñuñuri-Miranda <sup>1</sup>, Miguel Olivas-Martinez <sup>1</sup>, José Alberto Ibarra-Espinoza <sup>1</sup>, Rosalva Josefina Rodríguez-Córdova <sup>1,2</sup>, Karol Yesenia Hernández-Giottonini <sup>1,2</sup>, Daniel Fernández-Quiroz <sup>1</sup>, Paul Zavala-Rivera <sup>1,2</sup> and Armando Lucero-Acuña <sup>1,2\*</sup>

<sup>1</sup> Department of Chemical and Metallurgical Engineering, University of Sonora, Hermosillo, SON 83000, Mexico; [a212205033@unison.mx](mailto:a212205033@unison.mx) (O.P.-M.); [miguel.olivas@unison.mx](mailto:miguel.olivas@unison.mx) (M.O.-M.); [a217201103@unison.mx](mailto:a217201103@unison.mx) (J.A.I.-E.); [rosalva.rodriguez@unison.mx](mailto:rosalva.rodriguez@unison.mx) (R.J.R.-C.); [yesenia.hgio@hotmail.com](mailto:yesenia.hgio@hotmail.com) (K.Y.H.-G.); [daniel.fernandez@unison.mx](mailto:daniel.fernandez@unison.mx) (D.F.-Q.); [paul.zavala@unison.mx](mailto:paul.zavala@unison.mx) (P.Z.-R.);

<sup>2</sup> Nanotechnology Graduate Program, Department of Physics, University of Sonora, Hermosillo, SON 83000, Mexico

\* Correspondence: [armando.lucero@unison.mx](mailto:armando.lucero@unison.mx) (A.L.-A.); Tel.: +52 662 259 2105

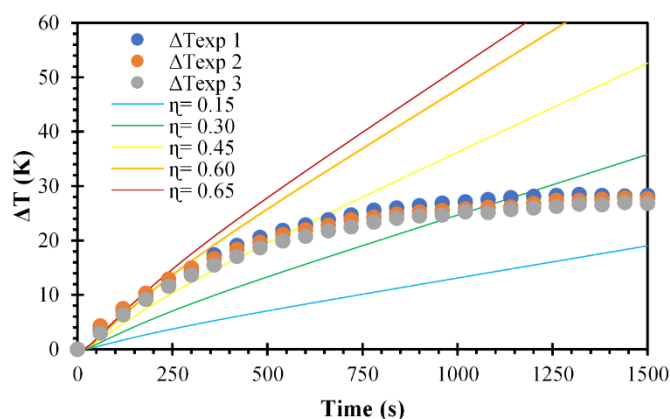

**Figure S1.** Temperature gradients at the thermocouple position (6.25 mm, 6.25 mm, 16 mm) for the adiabatic cell for different photothermal transduction efficiency ( $\eta$ ). The experimental data corresponds to a concentration of PPN of 30  $\mu\text{g/mL}$  and a pH value of 7.4.

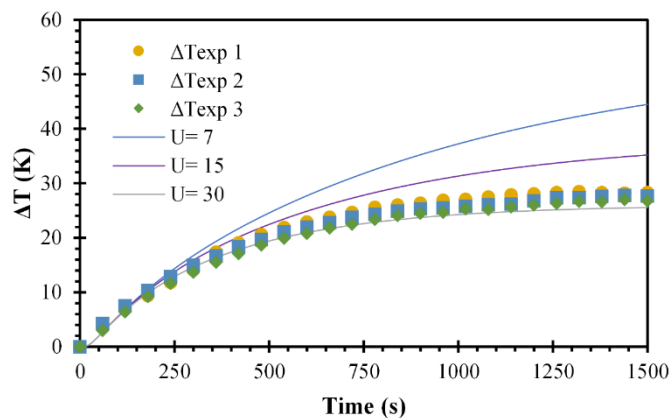

**Figure S2.** Calculated temperature gradients for different values of overall heat transfer coefficient ( $U$ ). The solid dots correspond to the experimental heating data at a concentration of PPN of 30  $\mu\text{g/mL}$  and a pH value of 7.4.

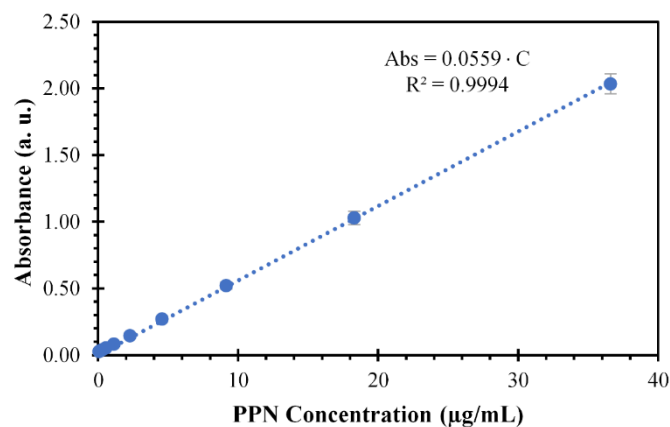

**Figure S3.** PPN calibration curve at a wavelength of 808 nm. The mass extinction coefficient ( $\epsilon$ ) of PPN is 0.0559 a. u./ $\left(\frac{\mu\text{g}}{\text{mL}} \cdot \text{cm}\right)$ . Mean  $\pm$ SD, n=3.

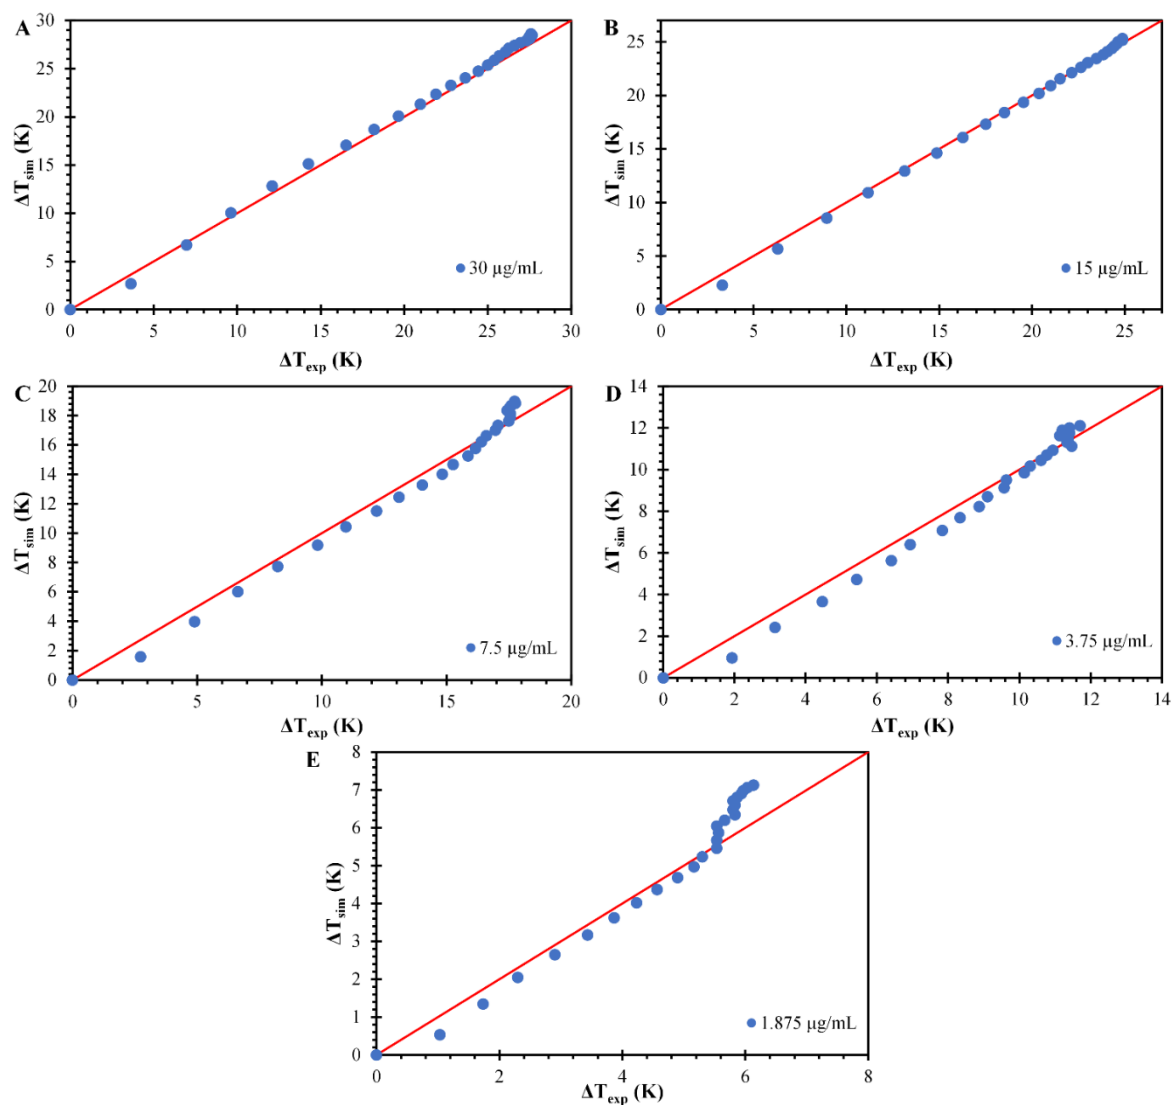

**Figure S4.** Comparative of simulated temperature gradients and experimental temperature gradients for the different concentrations of PPN at a pH value of 7.4.

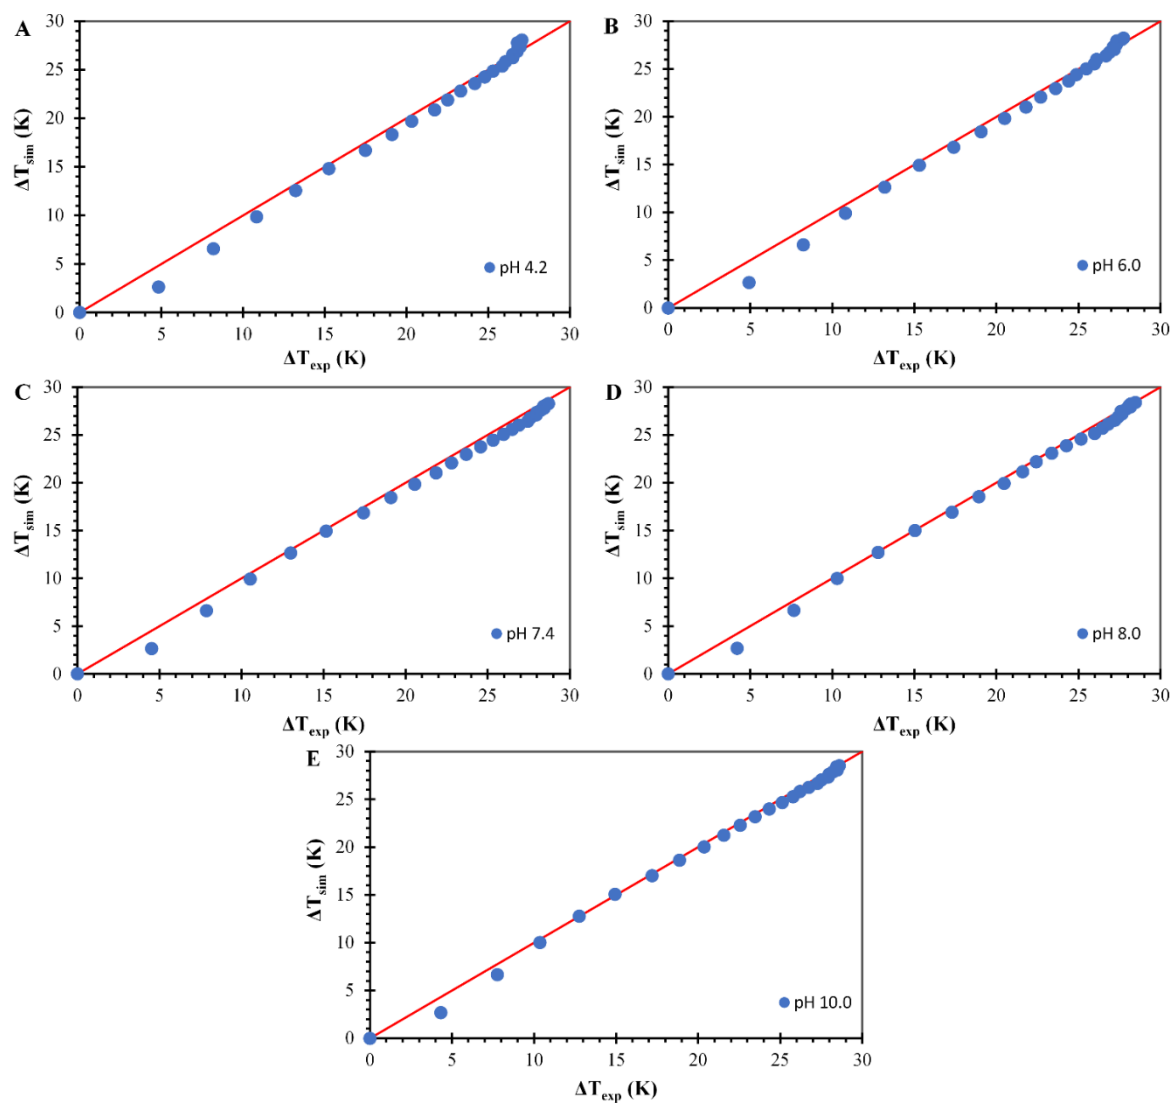

**Figure S5.** Comparative of simulated temperature gradients and experimental temperature gradients for the different pH values at a concentration of PPN of 30  $\mu\text{g/mL}$ .
